# Supplementary material
Source: PubMed Central journal article supplement (PMC7968775)
Supplement: 14-01169.pdf [file 14-01169.pdf]

**On-line Table: Clinical and angiographic findings in 40 patients with MCA aneurysms treated with the pCONus device**

| Pt | Sex, Age (yr) | Dome/Neck (mm) | Angiographic Results |            |        |             | Modified Rankin Scale |              |            |
|----|---------------|----------------|----------------------|------------|--------|-------------|-----------------------|--------------|------------|
|    |               |                | Immediate            | 3–6 Months | 1 Year | Retreatment | Initial               | At Discharge | At 30 Days |
| 1  | F, 76         | 9.8:5.5        | NR                   | C          | C      |             | 0                     | 1            | 1          |
| 2  | F, 54         | 7:5.2          | AR                   | NR         | NR     |             | 0                     | 0            | 0          |
| 3  | F, 65         | 7.9:2.7        | AR                   | C          | C      |             | 0                     | 0            | 0          |
| 4  | M, 51         | 9.1:5.3        | NR                   | NR         | C      |             | 0                     | 0            | 0          |
| 5  | M, 46         | 11.1:10.6      | AR                   | AR         | AR(w)  | X           | 3                     | 2            | 1          |
| 6  | M, 44         | 7.1:4          | NR                   | AR         |        | X           | 2                     | 2            | 2          |
| 7  | M, 51         | 14.3:13.8      | AR                   | AR(w)      |        | X           | 0                     | 0            | 0          |
| 8  | M, 62         | 5.1:6.6        | NR                   | AR         |        | X           | 0                     | 0            | 0          |
| 9  | F, 58         | 4.3:4.7        | AR                   | C          | C      |             | 0                     | 0            | 0          |
| 10 | F, 68         | 17.4:6.1       | NR                   | NR         | NR     |             | 0                     | 0            | 0          |
| 11 | F, 57         | 13.1:6.1       | AR                   | AR(w)      | AR(w)  | X           | 0                     | 0            | 0          |
| 12 | F, 56         | 5.7:4.8        | NR                   | C          |        |             | 0                     | 0            | 0          |
| 13 | F, 56         | 7.7:5.1        | AR                   | NR         |        |             | 0                     | 0            | 0          |
| 14 | F, 53         | 11.1:8.5       | NR                   | AR         | AR(w)  |             | 2                     | 2            | 1          |
| 15 | M, 76         | 3.2:4.8        | AR                   | C          |        |             | 3                     | 3            | 0          |
| 16 | F, 53         | 4.6:4.5        | NR                   | C          |        |             | 0                     | 0            | 0          |
| 17 | F, 58         | 11.2:3.3       | NR                   | C          |        |             | 0                     | 0            | 0          |
| 18 | F, 75         | 4.1:6.1        | NR                   | NR         |        |             | 0                     | 0            | 0          |
| 19 | F, 68         | 2.7:5.3        | AR                   | NR         |        |             | 0                     | 0            | 0          |
| 20 | M, 60         | 7.4:3.2        | NR                   | C          |        |             | 0                     | 0            | 0          |
| 21 | F, 64         | 4.9:2.8        | NR                   | C          |        |             | 0                     | 0            | 0          |
| 22 | F, 62         | 6.1:4.5        | C                    | C          |        |             | 0                     | 0            | 0          |
| 23 | M, 61         | 7.6:5.2        | NR                   | NR         |        |             | 0                     | 0            | 0          |
| 24 | F, 68         | 11.3:9.8       | NR                   | NR         |        |             | 0                     | 0            | 0          |
| 25 | F, 63         | 4.6:4.9        | C                    | C          |        |             | 0                     | 0            | 0          |
| 26 | F, 62         | 4.6:5          | C                    |            |        |             | 0                     | 0            | 0          |
| 27 | F, 56         | 6.3:5.5        | C                    |            |        |             | 0                     | 0            | 0          |
| 28 | F, 53         | 5.6:4.6        | AR                   |            |        |             | 0                     | 0            | 0          |
| 29 | M, 77         | 10.8:8.2       | AR                   | AR(w)      |        | X           | 0                     | 0            | 0          |
| 30 | F, 52         | 8:3.5          | NR                   |            |        |             | 1                     | 1            | 1          |
| 31 | F, 49         | 8.8:5.4        | NR                   | C          | C      |             | 0                     | 0            | 0          |
| 32 | M, 36         | 6.3:5.1        | C                    | C          | C      |             | 0                     | 0            | 0          |
| 33 | F, 50         | 15:9.2         | NR                   | NR         | NR     |             | 1                     | 1            | 1          |
| 34 | M, 49         | 6.8:6.4        | C                    |            |        |             | 1                     | 1            | 1          |
| 35 | F, 60         | 6.6:4.7        | C                    |            |        |             | 1                     | 1            | 1          |
| 36 | M, 41         | 4.2:5.1        | NR                   | NR         |        |             | 0                     | 0            | 0          |
| 37 | F, 53         | 5.5:3.3        | C                    | C          | C      |             | 0                     | 0            | 0          |
| 38 | F, 53         | 7:5            | C                    | C          |        |             | 0                     | 0            | 0          |
| 39 | F, 69         | 6:5            | NR                   | NR         |        | X           | 0                     | 0            | 0          |
| 40 | M, 50         | 7:5            | C                    | C          | C      |             | 0                     | 0            | 0          |

**Note:**—Pt indicates patient; C, complete aneurysm occlusion; NR, neck remnant; AR, aneurysm remnant; w, worsening; X, retreatment was done.
